# Supplementary material for: Geriatric Dentistry Curriculum in Six Continents
Source: MDPI journal article supplement (doi:10.3390/ijerph17134682), 2020-06-29
Supplement: s1 [file s1]

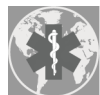

## Supplsupporting Information

**Table S1.** Curriculum content in geriatric dentistry in Dental Schools questionnaire.

| Curriculum content in geriatric dentistry in dental schools                                                                                                                                                                                                     |
|-----------------------------------------------------------------------------------------------------------------------------------------------------------------------------------------------------------------------------------------------------------------|
| 1. Name of dental school and country of origin?<br>_____                                                                                                                                                                                                        |
| 2. Is it a public or private school? Mark only one oval. <ul style="list-style-type: none"><li>• Public</li><li>• Private</li></ul>                                                                                                                             |
| 3. Years of predoctoral education at your institution? Mark only one oval. <ul style="list-style-type: none"><li>• 3 year program</li><li>• 4 year program</li><li>• 5 year program</li><li>• 6 year program</li><li>• Other: _____</li></ul>                   |
| 4. Indicate the years of predoctoral education Geriatric Dentistry is taught:<br>_____                                                                                                                                                                          |
| 5. Average size of graduating class? (N <sup>o</sup> students)<br>_____                                                                                                                                                                                         |
| 6. Is expansion of geriatric teaching currently being planned? Mark only one oval. <ul style="list-style-type: none"><li>• Yes</li><li>• No</li></ul>                                                                                                           |
| 7. Position of person answering the questionnaire? Mark only one oval. <ul style="list-style-type: none"><li>• Dean or Administrative Officer</li><li>• Department Chairman</li><li>• Program Director for Geriatric Dentistry</li><li>• Other: _____</li></ul> |
| 8. Didactic courses/seminars in geriatric dentistry is: Mark only one oval. <ul style="list-style-type: none"><li>• Elective</li></ul>                                                                                                                          |

- 
- Compulsory

9. The clinical education program in geriatric dentistry teaching is: Mark only one oval.

- Elective
- Compulsory

10. The geriatric program consists of: Tick all that apply.

- Independent courses
- Organized series of lectures
- Occasional lectures
- Formal course
- Other:\_\_\_\_\_

11. If you have a geriatric program, who is responsible for teaching it? Mark only one oval.

- Director of program in geriatric dentistry.
  - No person in particular.
  - Multidisciplinary team.
- Other:\_\_\_\_\_

12. The person responsible for teaching geriatric dentistry is: Tick all that apply.

- Formally trained in geriatric dentistry, geriatric or gerontology
  - Trained in prosthodontics
  - Trained in oral medicine
- Trained in working with special needs populations
  - Trained in dental public health
- Other:\_\_\_\_\_

13. What is the main method by which didactic geriatric dentistry is presented to your students? Mark only one oval.

- A specific independent course in geriatric dentistry
- An organized series of presentations in other courses in the curriculum
- Occasional lectures as part of some of the clinical specialties
  - No geriatric dentistry is taught
- Other:\_\_\_\_\_

14. Inclusion of geriatric dentistry teaching into curriculum over time: Mark only one oval.

- Teaching geriatric dentistry
    - As a required course
    - As a specific course
  - Lecture in another course
-

- 
- Integration into curriculum
  - Other: \_\_\_\_\_

15. Which departments lecture Geriatric Dentistry? Tick all that apply.

- Preventive, community, public health
  - Prosthodontics
- Comprehensive Care, Family Dentistry
  - Special patient care
  - Multiple departments
  - Oral surgery
- Other: \_\_\_\_\_

16. Which students participate in the didactic geriatric dentistry curriculum? (please check all that apply)

- 1st year dental students
- 2nd year dental students
- 3rd year dental students
- 4th year dental students
- 5th year dental students
- 6th year dental students

17. The format of teaching geriatric dentistry in the curriculum is: Mark only one oval.

- A didactic course or seminar only.
- A clinical rotation in extramural sites only.
  - Combination of a and b.
- Other: \_\_\_\_\_

18. Which topics are covered in the curriculum? Mark only one oval per row.

- |                                                          |                                                                                                                                                                                                                                                                                                                              |
|----------------------------------------------------------|------------------------------------------------------------------------------------------------------------------------------------------------------------------------------------------------------------------------------------------------------------------------------------------------------------------------------|
|                                                          | Elective/ Compulsory                                                                                                                                                                                                                                                                                                         |
|                                                          | <ul style="list-style-type: none"> <li>• Medical problems of the elderly</li> <li>• Drug induced dental disease in the elderly</li> </ul>                                                                                                                                                                                    |
| • Oral manifestations of systemic disease of the elderly | Diagnosis and management of oral conditions of the elderly <ul style="list-style-type: none"> <li>• (caries, endodontics, periodontal disease, oral problems)</li> </ul>                                                                                                                                                     |
| • Oral and dental tissue changes associated with aging   | Restorative management of the elderly using modifications of standard techniques <ul style="list-style-type: none"> <li>• Nutritional problems of the aging patient</li> <li>• Demographic distribution of the elderly               <ul style="list-style-type: none"> <li>• Socio-economic problems</li> </ul> </li> </ul> |
| • Psychosocial problems "Aging" and theories of aging    | Barriers to dental care Geriatric assessment scales <ul style="list-style-type: none"> <li>• Visual and auditory loss in the elderly</li> <li>• Speech and hearing problems</li> </ul>                                                                                                                                       |
-

- 
- Oral management of the functionally independent adult Oral management of the frail elderly
    - Oral management of the homebound, institutionalized and hospitalized elderly
      - Home care and the use of portable equipment
  - Restorative management of the elderly with neurological problems (Parkinson's, myasthenia graves, etc.)
  - Restorative management of persons with depression Restorative management of persons with Alzheimer's disease and other dementia's
    - Restorative management of the elderly with regards to adaptation and learning
      - Other

19. If clinical care occurs at a remote site, where is it? Tick all that apply.

- Nursing home
- Geriatric hospital/ward
- Old people's home
- Geriatric day care center
- Congregate meals
- Clinic in a sheltered housing or high rise apartments
  - Satellite or community clinics
    - House calls
    - Senior center
    - Recreation center
    - Churches
- Other: \_\_\_\_\_

20. If you have predoctoral curriculum in geriatric dentistry, who is responsible for coordinating it? Mark only one oval.

- Director of program in geriatric dentistry
  - No one in particular
  - Multidisciplinary team
- Other: \_\_\_\_\_

21. Which departments have the main responsibility for teaching the didactic course? Mark only one oval.

- Preventive, community, health ecology
  - Prosthodontics
- Comprehensive care, family dentistry
  - Special patient care
  - Multiple departments
- Other: \_\_\_\_\_

22. Which departments have the main responsibility for teaching the clinical course? Mark only one oval.

- Preventive, community, health ecology
    - Prosthodontics
-

---

- Comprehensive care, family dentistry
  - Special patient care
  - Multiple departments
- Other: \_\_\_\_\_

23. How is the geriatric program currently funded? Mark only one oval per row.

Undergraduate Program/ Postgraduate Program

- Federal government
- Local government
- Private grant
- Patient revenue (fee for service)
- As a special program with restricted funds

24. How many thesis, undergraduate degree work or publications on Gerontology, Geriatrics or Geriatric Dentistry have been made in the last 10 years?

\_\_\_\_\_

25. Final thoughts?

\_\_\_\_\_

---

**Table S2.** Inclusion of geriatric dentistry teaching into curriculum over time, expressed as percentage from total responses.

|                              | USA<br>1974[4,8,9] | USA<br>1979[4,8,9] | USA<br>1985[4,8,9] | Canada<br>1998[11] | USA<br>1998[4,8,9,11] | USA<br>2003[4,6,8] | Chile<br>2014[3] | USA<br>2016[4,9] | North<br>America<br>2019 | South<br>America<br>2019 | Europe<br>2019 | Africa<br>2019 | Asia<br>2019 | Oceania<br>2019 |
|------------------------------|--------------------|--------------------|--------------------|--------------------|-----------------------|--------------------|------------------|------------------|--------------------------|--------------------------|----------------|----------------|--------------|-----------------|
| Type of instruction          | N = 59             | N = 58             | N = 56             | N = 9              | N = 52                | N = 54             | N = 19           | N = 56           | N = 10                   | N = 30                   | N = 24         | N = 4          | N = 13       | N = 2           |
| Teaching geriatric dentistry | 57.6               | 100.0              | 100.0              | 33.0               | 100.0                 | 100.0              | 84.0             | 100.0            | 100.0                    | 100.0                    | 100.0          | 100.0          | 100.0        | 100.0           |
| As a required course         | 0.0                | 77.5               | 66.6               | 33.0               | 88.0                  | 98.0               | -                | 92.8             | 30.0                     | 16.7                     | 4.3            | 0.0            | 15.4         | 0.0             |
| As a specific course         | 0.0                | 12.1               | 58.0               | 22.0               | 83.0                  | 50.0               | 37.0             | 62.5             | 0.0                      | 6.7                      | 21.7           | 0.0            | 30.8         | 0.0             |
| Lecture in another course    | 44.1               | 69.0               | 85.0               | 44.0               | 44.1                  | 22.0               | 32.0             | 25.0             | 20.0                     | 3.3                      | 21.7           | 25.0           | 0.0          | 50.0            |
| Integrated into curriculum   | -                  | 29.3               | -                  | 78.0               | 38.5                  | 18.0               | 10.0             | 8.9              | 10.0                     | 60.0                     | 26.1           | 75.0           | 46.2         | 50.0            |
| Other                        | -                  | 5.2                | 0.0                | -                  | 13.5                  | 8.0                | -                | 3.6              | 30.0                     | 0.0                      | 0.0            | 0.0            | 0.0          | 0.0             |

**Table S3.** Comparison of dedicated gerodontology teaching formats in over 40 years, expressed as percentage from total responses.

|                                         | USA<br>1974[8] | USA<br>1979[8,13] | USA<br>1985[8] | USA<br>1998[8] | USA<br>2003[6,8] | Austria,<br>Switzerland,<br>Germany<br>2004[5] | Austria,<br>Switzerland,<br>Germany<br>2009[5] | Austria,<br>Switzerland,<br>Germany<br>2014[5] | USA<br>2016[4,10] | North<br>America<br>2019 | South<br>America<br>2019 | Europe<br>2019 | Africa<br>2019 | Asia<br>2019 | Oceania<br>2019 |
|-----------------------------------------|----------------|-------------------|----------------|----------------|------------------|------------------------------------------------|------------------------------------------------|------------------------------------------------|-------------------|--------------------------|--------------------------|----------------|----------------|--------------|-----------------|
| Comparison of formats                   | N = 59         | N = 58            | N = 56         | N = 52         | N = 54           | N = 38                                         | N = 37                                         | N = 33                                         | N = 56            | N = 10                   | N = 30                   | N = 24         | N = 4          | N = 13       | N = 2           |
| A didactic course or seminar            | -              | 69.0              | -              | -              | 98.0             | 10.5                                           | 13.5                                           | 9.1                                            | -                 | 10.0                     | 23.3                     | 33.3           | 25.0           | 38.5         | 0.0             |
| A clinical rotation in extramural sites | 43.0           | 78.0              | 64.0           | 55.0           | 67.0             | 7.9                                            | 13.5                                           | 6.0                                            | 67.9              | 0.0                      | 6.7                      | 4.2            | 0.0            | 0.0          | 0.0             |
| Combination of both                     | -              | -                 | -              | -              | 28.0             | 15.8                                           | 21.6                                           | 18.2                                           | -                 | 90.0                     | 60.0                     | 54.2           | 50.0           | 53.8         | 100.0           |
| Other                                   | -              | -                 | -              | -              | 9.0              | -                                              | -                                              | -                                              | -                 | 0.0                      | 10.0                     | 8.3            | 25.0           | 7.7          | 0.0             |

**Table S4.** Topics covered by lectures and seminars: (A) traditional topics (oral medicine/prosthodontics) and (B) non-traditional topics (gerontologic), expressed as a percentage from total responses.

|                                                                                  | USA<br>1979[13] | USA<br>1981[9] | USA<br>1987[9] | USA<br>1998[9] | USA<br>2003[6,9] | Europe<br>2005[12] | Chile<br>2014[3] | USA 2015[4]          |                    | Europe<br>2016[2] | USA 2016[9]          |                   | Six continents 2019  |                    |
|----------------------------------------------------------------------------------|-----------------|----------------|----------------|----------------|------------------|--------------------|------------------|----------------------|--------------------|-------------------|----------------------|-------------------|----------------------|--------------------|
| (A) Traditional Topics taught over the past 30 y.                                | N = 58          | N = 58         | N = 56         | N = 52         | N = 54           | N = 82             | N = 19           | Compulsory<br>N = 56 | Elective<br>N = 56 | N = 123           | Compulsory<br>N = 53 | Elective<br>N = 3 | Compulsory<br>N = 83 | Elective<br>N = 83 |
| Medical problems of the elderly                                                  | 81.0            | 81.0           | 100.0          | 93.7           | 100.0            | 84.0               | 100.0            | 91.1                 | 3.6                | 70.7              | 96.2                 | 66.7              | 67.9                 | 32.1               |
| Oral and dental tissue changes associated with aging                             | 79.3            | 79.3           | 100.0          | 92.1           | 98.0             | 83.0               | 85.0             | 83.9                 | 3.6                | 61.0              | 89.3                 | 66.7              | 66.3                 | 33.7               |
| Drug-induced dental disease in the elderly                                       |                 | -              | 100.0          | 92.1           | -                | -                  | -                | 85.7                 | 3.6                | -                 | 94.3                 | 100.0             | 65.3                 | 34.7               |
| Diagnosis and management of oral conditions of the elderly                       | -               | -              | -              | 85.7           | 91.0             | 85.0               | 85.0             | 85.7                 | 3.6                | 49.6              | 90.6                 | 66.7              | 75.0                 | 25.0               |
| caries, endodontics, periodontal disease, oral problems                          |                 |                |                |                |                  |                    |                  |                      |                    |                   |                      |                   |                      |                    |
| Oral manifestations of systemic disease of the elderly                           | 84.5            | 84.5           | 100.0          | 58.7           | 96.0             | 87.0               | 85.0             | 89.3                 | 5.4                | -                 | 88.6                 | 66.7              | 73.1                 | 26.9               |
| Restorative management of the elderly using modifications of standard techniques | 37.9            | 37.9           | 100.0          | 73.0           | 65.0             | 57.0               | 75.0             | 73.2                 | 1.8                | -                 | 77.4                 | 33.3              | 68.0                 | 32.0               |
| Nutritional problems of the aging patient                                        | -               | -              | 89.0           | -              | 79.0             | 59.0               | 75.0             | 64.3                 | 3.6                | 56.1              | 67.9                 | 66.7              | 62.3                 | 37.7               |

**(B) Non-traditional Topics**  
**Gerontologic topics taught**  
**over the past 30 y.**

|                                                                                                       |      |      |       |      |       |      |       |      |     |      |       |       |      |      |
|-------------------------------------------------------------------------------------------------------|------|------|-------|------|-------|------|-------|------|-----|------|-------|-------|------|------|
| Barriers to dental care                                                                               | 48.3 | 48.3 | 95.0  | -    | 100.0 | 54.0 | 70.0  | 94.6 | 3.6 | 45.5 | 100.0 | 66.7  | 68.6 | 31.4 |
| Socioeconomic problems                                                                                | 72.4 | 72.4 | 100.0 | 87.3 | 92.0  | 56.0 | 85.0  | 92.9 | 5.4 | -    | 98.1  | 100.0 | 65.1 | 34.9 |
| Demographic distribution of the elderly                                                               | 48.3 | 48.3 | 96.0  | 95.2 | 85.0  | 65.0 | 100.0 | 92.9 | 5.4 | 61.8 | 98.1  | 100.0 | 67.7 | 32.3 |
| Psycho-social problems                                                                                | 75.9 | 75.9 | -     | 87.3 | 98.0  | 66.0 | 85.0  | 83.9 | 5.4 | -    | 88.6  | 100.0 | 59.1 | 40.9 |
| Restorative management of persons with Alzheimer's disease and other dementias                        | -    | 37.9 | 90.0  | 68.3 | -     | -    | -     | 80.4 | 1.8 | -    | 84.9  | 33.3  | 61.7 | 38.3 |
| "Ageing" and theories of ageing                                                                       | 58.6 | 58.6 | 81.0  | -    | 85.0  | 61.0 | 100.0 | 78.6 | 3.6 | 57.7 | 83.0  | 66.7  | 58.8 | 41.2 |
| Oral management of the functionally independent adult                                                 | -    | 72.4 | 78.0  | 84.1 | 91.0  | 72.0 | 85.0  | 78.6 | 3.6 | -    | 83.0  | 66.7  | 68.2 | 31.8 |
| Oral management of the frail elderly                                                                  | 44.8 | 44.8 | 80.0  | 84.1 | 77.0  | 56.0 | 75.0  | 78.6 | 5.4 | 48.0 | 83.0  | 100.0 | 59.1 | 40.9 |
| Oral management of the homebound, institutionalized and hospitalized elderly                          | 44.8 | 44.8 | 80.0  | 84.1 | 59.0  | 48.0 | 55.0  | 73.2 | 3.6 | -    | 77.4  | 66.7  | 58.7 | 41.3 |
| Visual and auditory loss in the elderly                                                               | 32.8 | 32.8 | -     | -    | 68.0  | 39.0 | 75.0  | 71.4 | 3.6 | -    | 75.5  | 66.7  | 63.2 | 36.8 |
| Speech and hearing problems                                                                           | -    | -    | -     | -    | -     | -    | -     | 69.6 | 3.6 | -    | 73.6  | 66.7  | 58.5 | 41.5 |
| Restorative management of the elderly with neurological problems Parkinson's, myasthenia graves, etc. | 37.9 | 37.9 | -     | 68.3 | 62.0  | 54.0 | 55.0  | 67.9 | 1.8 | -    | 71.7  | 33.3  | 54.7 | 45.3 |
| Geriatric assesment scales                                                                            | -    | -    | -     | -    | 60.0  | 23.0 | 70.0  | 78.6 | 5.4 | 47.2 | 64.2  | 66.7  | 50.9 | 49.1 |
| Restorative management of the elderly with regards to adaptation and learning                         | 41.4 | 37.9 | 78.0  | -    | 60.0  | 63.0 | 85.0  | 57.1 | 3.6 | -    | 60.4  | 66.7  | 59.6 | 40.4 |
| Home care and the use of portable equipment                                                           | -    | -    | -     | -    | -     | 32.0 | 30.0  | -    | -   | 28.5 | -     | -     | 50.9 | 49.1 |
| Other                                                                                                 | 8.6  | -    | -     | -    | -     | -    | 30.0  | 19.6 | 1.8 | -    | -     | -     | 59.1 | 40.9 |

**Table S5.** Funding of geriatric undergraduate programs, expressed as percentage from total responses.

|                                            | USA<br>1979[8,13] | USA<br>1985[8] | USA<br>1998[8] | USA<br>2003[8] | North<br>America 2019 | South<br>America 2019 | Europe<br>2019 | Africa<br>2019 | Asia<br>2019 |
|--------------------------------------------|-------------------|----------------|----------------|----------------|-----------------------|-----------------------|----------------|----------------|--------------|
| Source of funds                            | N = 58            | N = 56         | N = 52         | N = 54         | N = 6                 | N = 23                | N = 18         | N = 2          | N = 8        |
| Line item in school budget                 | 0.0               | -              | 58.1           | 40.0           | -                     | -                     | -              | -              | -            |
| Federal government                         | 9.8               | 10.7           | 9.7            | 1.0            | 0.0                   | 52.2                  | 88.9           | 50.0           | 25.0         |
| Local/ state government                    | 26.4              | 53.5           | 8.1            | 7.0            | 33.3                  | 34.8                  | 27.8           | 50.0           | 25.0         |
| Corporate/private grants                   | 5.5               | -              | 9.7            | 0.0            | 33.3                  | 13.0                  | 22.2           | 0.0            | 12.5         |
| Patient revenue                            | 44.4              | 79.0           | 38.7           | 52.0           | 66.7                  | 13.0                  | 33.3           | 50.0           | 25.0         |
| As a special program with restricted funds | -                 | -              | -              | -              | 33.3                  | 17.4                  | 11.1           | 0.0            | 12.5         |
| Other                                      | 13.9              | -              | 17.7           | -              | -                     | -                     | -              | -              | -            |

**Table S6.** Remote sites of clinical geriatric care, expressed as percentage from total responses.

|                                                       | USA<br>1974[8] | USA<br>1979[8,13] | USA<br>1985[8] | USA<br>1998[8] | USA<br>2016[4,10] | North<br>America<br>2019 | South<br>America<br>2019 | Europe<br>2019 | Africa<br>2019 | Asia<br>2019 |       |
|-------------------------------------------------------|----------------|-------------------|----------------|----------------|-------------------|--------------------------|--------------------------|----------------|----------------|--------------|-------|
| Sites                                                 | N = 59         | N = 58            | N = 56         | N = 52         | N = 56            | N = 8                    | N = 18                   | N = 13         | N = 1          | N = 10       | N = 1 |
| Nursing home                                          | 39.0           | 43.1              | 27.0           | 55.0           | 37.5              | 75.0                     | 44.4                     | 46.2           | 0.0            | 0.0          | 100.0 |
| Geriatric hospital/ ward                              | 15.3           | 17.2              | 40.0           | 20.0           | 0.0               | 50.0                     | 27.8                     | 30.8           | 0.0            | 0.0          | 100.0 |
| Old people's home                                     | -              | -                 | -              | -              | -                 | 25.0                     | 50.0                     | 38.5           | 100.0          | 70.0         | 100.0 |
| Geriatric day care center                             | -              | 15.5              | -              | 13.0           | 14.3              | 25.0                     | 55.6                     | 23.1           | 0.0            | 0.0          | 100.0 |
| Congregate meals                                      | -              | -                 | -              | -              | -                 | 0.0                      | 5.6                      | 0.0            | 0.0            | 0.0          | 0.0   |
| Clinic in a sheltered housing or high-rise apartments | 8.5            | 6.9               | -              | 12.0           | -                 | 12.5                     | 5.6                      | 0.0            | 0.0            | 0.0          |       |
| Satellite or community clinics                        | 20.3           | 31.0              | -              | 18.0           | 60.7              | 37.5                     | 0.0                      | 23.1           | 100.0          | 70.0         | 100.0 |
| House calls                                           | -              | -                 | -              | -              | -                 | 25.0                     | 5.6                      | 15.4           | 0.0            | 0.0          | 0.0   |
| Senior center                                         | -              | -                 | -              | -              | 21.4              | 50.0                     | 11.1                     | 7.7            | 0.0            | 0.0          |       |
| Recreation center                                     | -              | -                 | -              | -              | -                 | 12.5                     | 5.6                      | 0.0            | 0.0            | 0.0          | 0.0   |
| Churches                                              | -              | -                 | -              | -              | 7.1               | 0.0                      | 11.1                     | 0.0            | 0.0            | 0.0          | 0.0   |
| Mobile Unit                                           | 10.2           | 10.3              | 1.8            | 8.0            | 12.5              | 0.0                      | 0.0                      | 0.0            | 0.0            | 0.0          | 0.0   |



**Table S7.** Department responsible for teaching didactic (D) and clinical (C) geriatric dentistry, expressed as percentage from total responses.

|                                       | USA 1976[13] | USA 1979[13] | USA 2016[4] |             | Austria 2017[5] | Switzerland 2017[5] | Germany 2017[5] | North America 2019 |             | South America 2019 |             | Europe 2019 |             | Africa 2019 |            | Asia 2019   |             | Oceania 2019 |            |
|---------------------------------------|--------------|--------------|-------------|-------------|-----------------|---------------------|-----------------|--------------------|-------------|--------------------|-------------|-------------|-------------|-------------|------------|-------------|-------------|--------------|------------|
| Department                            | N = 34       | N = 58       | D<br>N = 55 | C<br>N = 55 | N = 7           | N = 6               | N = 53          | D<br>N = 10        | C<br>N = 10 | D<br>N = 29        | C<br>N = 28 | D<br>N = 21 | C<br>N = 21 | D<br>N = 4  | C<br>N = 4 | D<br>N = 12 | C<br>N = 12 | D<br>N = 2   | C<br>N = 2 |
| Preventive, community, health ecology | 70.6         | 51.7         | 28.6        | 25.0        | 43.8            | 35.3                | 50.0            | 0.0                | 0.0         | 13.8               | 17.9        | 19.0        | 9.5         | 25.0        | 25.0       | 0.0         | 0.0         | 0.0          | 0.0        |
| Prosthodontics                        | 32.4         | 58.6         | 5.4         | 5.4         | 75.0            | 25.0                | 60.0            | 10.0               | 20.0        | 31.0               | 35.7        | 28.9        | 42.9        | 25.0        | 25.0       | 25.0        | 33.3        | 0.0          | 0.0        |
| Comprehensive care, family dentistry  | 11.8         | 6.9          | 17.9        | 17.9        | 50.0            | 25.0                | 55.0            | 30.0               | 40.0        | 0.0                | 0.0         | 0.0         | 0.0         | 0.0         | 0.0        | 0.0         | 8.3         | 0.0          | 0.0        |
| Special patient care                  | 5.9          | 13.8         | 7.1         | 7.1         | -               | -                   | -               | 0.0                | 0.0         | 3.4                | 0.0         | 9.5         | 14.3        | 25.0        | 25.0       | 0.0         | 0.0         | 100.0        | 100.0      |
| Multiple departments                  | 5.9          | 19.0         | 21.4        | 21.4        | -               | -                   | -               | 50.0               | 30.0        | 41.4               | 35.7        | 28.9        | 23.8        | 0.0         | 25.0       | 75.0        | 58.3        | 100.0        | 100.0      |
| Oral medicine                         | 5.9          | 10.3         | -           | -           | 25.0            | 25.0                | 40.0            | 0.0                | 0.0         | 0.0                | 0.0         | 0.0         | 0.0         | 0.0         | 0.0        | 0.0         | 0.0         | 0.0          | 0.0        |
| Other                                 | 20.0         | -            | 17.9        | 21.4        | -               | -                   | -               | 10.0               | 10.0        | 10.3               | 10.7        | 14.3        | 9.5         | 25.0        | 25.0       | 0.0         | 0.0         | 0.0          | 0.0        |
